# Supplementary material for: A peptide functionalized poly(ethylene glycol) (PEG) hydrogel for investigating the influence of biochemical and biophysical matrix properties on tumor cell migration
Source: Royal Society of Chemistry journal article supplement (doi:10.1039/c4bm00022f), 2014-01-01
Supplement: c4bm00022f1.pdf [file c4bm00022f1.pdf]

| Fraction Migrating |                  |                |                 |
|--------------------|------------------|----------------|-----------------|
| 60 Pa              |                  | 60 $\mu$ M RGD | 620 $\mu$ M RGD |
|                    | 620 $\mu$ M RGD  | **             |                 |
|                    | 1480 $\mu$ M RGD | **             | NS              |
| 120 Pa             |                  | 70 $\mu$ M RGD | 710 $\mu$ M RGD |
|                    | 710 $\mu$ M RGD  | **             |                 |
|                    | 1700 $\mu$ M RGD | **             | NS              |
| 260 Pa             |                  | 80 $\mu$ M RGD | 790 $\mu$ M RGD |
|                    | 790 $\mu$ M RGD  | **             |                 |
|                    | 1900 $\mu$ M RGD | NS             | *               |

| Speed  |                  |                |                 |
|--------|------------------|----------------|-----------------|
| 60 Pa  |                  | 60 $\mu$ M RGD | 620 $\mu$ M RGD |
|        | 620 $\mu$ M RGD  | **             |                 |
|        | 1480 $\mu$ M RGD | **             | **              |
| 120 Pa |                  | 70 $\mu$ M RGD | 710 $\mu$ M RGD |
|        | 710 $\mu$ M RGD  | **             |                 |
|        | 1700 $\mu$ M RGD | **             | **              |
| 260 Pa |                  | 80 $\mu$ M RGD | 790 $\mu$ M RGD |
|        | 790 $\mu$ M RGD  | **             |                 |
|        | 1900 $\mu$ M RGD | **             | **              |

| Distance to Origin |                  |                |                 |
|--------------------|------------------|----------------|-----------------|
| 60 Pa              |                  | 60 $\mu$ M RGD | 620 $\mu$ M RGD |
|                    | 620 $\mu$ M RGD  | **             |                 |
|                    | 1480 $\mu$ M RGD | **             | **              |
| 120 Pa             |                  | 70 $\mu$ M RGD | 710 $\mu$ M RGD |
|                    | 710 $\mu$ M RGD  | **             |                 |
|                    | 1700 $\mu$ M RGD | NS             | **              |
| 260 Pa             |                  | 80 $\mu$ M RGD | 790 $\mu$ M RGD |
|                    | 790 $\mu$ M RGD  | **             |                 |
|                    | 1900 $\mu$ M RGD | **             | **              |
